# Supplementary material for: Investigation of the valence electronic states of Ti(iv) in Ti silicalite-1 coupling X-ray emission spectroscopy and density functional calculations
Source: Royal Society of Chemistry journal article supplement (doi:10.1039/c1cp21556f), 2011-01-01
Supplement: c1cp21556f.pdf [file c1cp21556f.pdf]

## SUPPORTING INFORMATION

### Investigation of the valence electronic states of Ti(IV) in Ti silicalite-1 coupling X-ray emission spectroscopy and density functional calculations

Erik Gallo,<sup>1,2,3</sup> Carlo Lamberti,<sup>2,\*</sup> Pieter Glatzel,<sup>1\*</sup>

<sup>1</sup> European Synchrotron Radiation Facility (ESRF) 6 Rue Jules Horowitz, BP 220 38043 Grenoble Cedex 9 France

<sup>2</sup> Department of Inorganic, Physical and Materials Chemistry, INSTM Reference Center and NIS Centre of Excellence, Università di Torino, Via P. Giuria 7, I-10125 Torino, Italy.

<sup>3</sup> Sciences Chimiques de Rennes - UMR 6226, Matériaux Inorganiques: Chimie Douce et réactivité, Université de Rennes 1, Campus de Beaulieu, Bât 10B, F-35042 Rennes, France.

In Figure S1, the spectra computed using TZVP/CP(PPP) basis sets and TPSSh density functional on the cluster T35\_MFI are reported, changing the Ti position in the framework. As clearly visible from the figure no T-dependency was found. This is due to the local character of the technique.

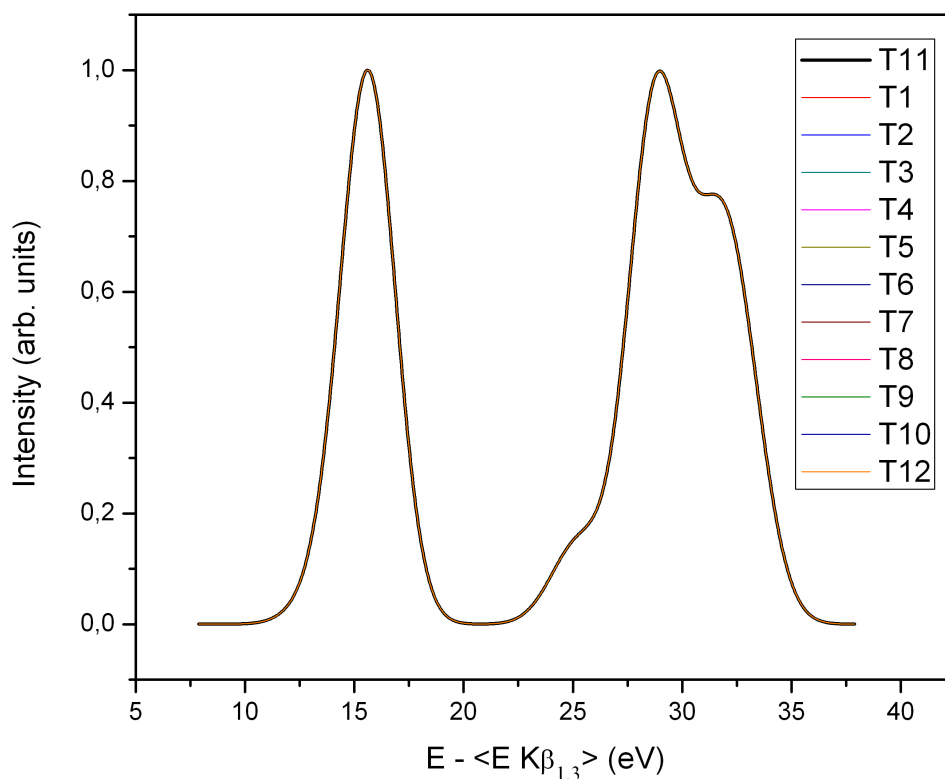

**Figure S1:** VtC-XES spectra computed adopting TPSSh/TZVP/CP(PPP) on the clusters T35\_MFI, optimized with the Ti atom in one of the twelve non equivalent crystallographic positions.

\* Corresponding authors: [carlo.lamberti@unito.it](mailto:carlo.lamberti@unito.it), [pieter.glatzel@esrf.fr](mailto:pieter.glatzel@esrf.fr).

**Table 1. Goodness factors for the VtC-XES spectra computed on the T5OH cluster using TZVP(ligands)/CP(PPP)(Ti) for a selection of density functionals.**

| Functional | $\Delta E_{\max}$ (eV) | $\Delta E_{\text{cm}}$ (eV) | $I_C/I_B$ ratio ( $\pm 0.005$ ) |
|------------|------------------------|-----------------------------|---------------------------------|
| LDA        | 17.7                   | 17.9                        | 0.829                           |
| GLYP       | 12.4                   | 12.66                       | 0.738                           |
| PBE        | 12.5                   | 13.03                       | 0.779                           |
| PWP        | 12.6                   | 12.7                        | 0.802                           |
| B1LYP      | 13.7                   | 14.5                        | 0.744                           |
| B3LYP      | 13.4                   | 13.6                        | 0.773                           |
| PBE0       | 13.8                   | 14.1                        | 0.79                            |
| TPSS       | 13.0                   | 13.6                        | 0.821                           |
| TPSSh      | 13.2                   | 13.8                        | 0.780                           |
| TPSS0      | 14.3                   | 15.0                        | 0.840                           |
| B2PLYP     | 15.2                   | 16.1                        | 0.823                           |
| Experiment | 13.2                   | 13.8                        | 0.781                           |
